# Supplementary material for: Relationship Between the Estimated Breeding Values for Litter Traits at Birth and Ovarian and Embryonic Traits and Their Additive Genetic Variance in Gilts at 35 Days of Pregnancy
Source: PubMed Central journal article supplement (PMC5896267; doi:10.3389/fgene.2018.00111), 2018-04-05
Supplement: Table_1.pdf [file Table_1.pdf]

*Supplementary Material*

**Consequences Of Genetic Selection For Litter Traits At Birth On Ovarian And Embryonic Traits In Gilts And Their Genetic Background**

**Carolina L.A. Da Silva<sup>1\*</sup>, Han A. Mulder<sup>2</sup>, Marleen L.W.J. Broekhuijse<sup>3</sup>, Bas Kemp<sup>1</sup>, Noline M. Soede<sup>1</sup>, Egbert F. Knol<sup>3</sup>**

**\* Correspondence: Carolina L.A. Da Silva** Corresponding Author: carolina.lima@wur.nl

Supplementary Table S1 . Least square means and SEM for ovarian and embryonic characteristics of gilts at 35 days of pregnancy for two different genetic lines (GL, Purebred Landrace and Crossbred Yorkshire x Landrace, respectively) and three different semen storage duration classes (SS; 3-5, 6-7 and 8-10 days, respectively). Batch (n=18) was included in the models as a random effect.

| Variables                             | Genetic Line (GL) |            | Semen Storage Classes (SS, d) |            |            | P Values     |              |              |
|---------------------------------------|-------------------|------------|-------------------------------|------------|------------|--------------|--------------|--------------|
|                                       | P                 | C          | 3-5                           | 6-7        | 8-10       | GL           | SS           | GL*SS        |
| n=                                    | 86                | 304        | 109                           | 159        | 122        |              |              |              |
| <b>Averages</b>                       |                   |            |                               |            |            |              |              |              |
| Ovulation Rate, OR                    | 22.10±0.35        | 20.31±0.19 | 21.06±0.32                    | 21.13±0.27 | 21.42±0.31 | <.0001       | 0.62         | NS           |
| Corpus luteum weight, g               | 0.44±0.01         | 0.44±0.01  | 0.44±0.01                     | 0.45±0.01  | 0.44±0.01  | 0.68         | 0.26         | NS           |
| Total luteal mass, g                  | 9.68±0.3          | 8.97±0.17  | 9.26±0.22                     | 9.41±0.20  | 9.30±0.21  | <b>0.006</b> | 0.74         | NS           |
| Uterine length, cm                    | 493.40±7.6        | 504.25±4.2 | 504.71±6.9                    | 503.13±5.8 | 488.63±6.6 | 0.20         | 0.09         | NS           |
| Number of embryos <sup>1</sup>        | 15.61±0.5         | 16.33±0.3  | 15.93±0.5                     | 16.56±0.4  | 15.42±0.5  | 0.18         | 0.18         | <b>0.008</b> |
| Number of vital embryos <sup>2</sup>  | 14.46±0.5         | 15.13±0.2  | 14.875±0.5                    | 15.20±0.4  | 14.32±0.5  | 0.18         | 0.34         | <b>0.004</b> |
| Early embryonic mortality             | 6.18±0.5          | 4.03±0.2   | 4.30±0.4a                     | 4.84±0.4a  | 6.17±0.4b  | <.0001       | <b>0.002</b> | NS           |
| Late embryonic mortality              | 1.19±0.2          | 1.20±0.1   | 1.16±0.2                      | 1.36±0.1   | 1.07±0.2   | 0.98         | 0.25         | NS           |
| Embryo weight, g                      | 4.39±0.2          | 4.16±0.1   | 4.44±0.2a                     | 4.31±0.1a  | 4.06±0.2b  | <b>0.05</b>  | <b>0.002</b> | NS           |
| Empty space <sup>3</sup> , cm         | 23.44±2.3         | 21.46±1.2  | 22.58±2.3                     | 20.95±1.8  | 23.81±2.3  | 0.44         | 0.60         | <b>0.03</b>  |
| Implantation length, cm               | 22.86±0.5         | 21.30±0.2  | 21.85±0.4                     | 22.18±0.4  | 22.21±0.4  | <b>0.003</b> | 0.77         | NS           |
| Implantation area, cm <sup>2</sup>    | 213.17±4.8        | 187.56±2.5 | 204.2±4.5                     | 196.7±3.7  | 200.2±4.3  | <.0001       | 0.39         | NS           |
| <b>Standard Deviations</b>            |                   |            |                               |            |            |              |              |              |
| Corpus luteum weight, g               | 0.05±0.003        | 0.05±0.002 | 0.05±0.002                    | 0.05±0.002 | 0.05±0.002 | 0.47         | 0.08         | NS           |
| Embryo weight, g                      | 0.42±0.02         | 0.39±0.02  | 0.40±0.02                     | 0.39±0.02  | 0.42±0.02  | 0.21         | 0.46         | NS           |
| Empty space <sup>4</sup> , cm         | 11.58±1.1         | 11.05±0.6  | 11.51±1.2                     | 10.71±0.9  | 14.40±2.1  | 0.68         | 0.76         | <b>0.009</b> |
| Implantation length <sup>5</sup> , cm | 5.78±0.2          | 5.31±0.1   | 5.94±0.2                      | 5.30±0.2   | 5.41±0.2   | <b>0.05</b>  | 0.06         | <b>0.03</b>  |

<sup>1</sup> Least square means estimates for the interactions genetic line\*semen storage duration (P=0.008): Purebreds\*SS1=14.4±0.9a; Purebreds\*SS2=17.0±0.7ab; Purebreds\* SS3=15.5±0.9ab; Crossbreds\*SS1=17.5±0.5b; Crossbreds\*SS2=16.2±0.4ab; Crossbreds\*SS3=15.3±0.4a.

### Consequences of selection for litter traits on ovarian and embryonic traits

<sup>2</sup> Least square means estimates for the interactions genetic line\*semen storage duration (P=0.008): Purebreds\*SS1=13.4±0.8a; Purebreds\*SS2=15.6±0.6ab; Purebreds\* SS3=14.4±0.9ab; Crossbreds\*SS1=16.4±0.4b; Crossbreds\*SS2=14.5±0.4ab; Crossbreds\*SS3=14.2±0.4a.

<sup>3</sup> Least square means estimates for the interactions genetic line\*semen storage duration (P=0.03): Purebreds\*SS1=27.9±4.1ab; Purebreds\*SS2=18.4±3.1ab; Purebreds\* SS3=24.0±4.2ab; Crossbreds\*SS1=17.3±2.2a; Crossbreds\*SS2=23.5±1.8b; Crossbreds\*SS3=23.6±1.9b.

<sup>4</sup> Least square means estimates for the interactions genetic line\*semen storage duration (P=0.01): Purebreds\*SS1=14.4±2.1a; Purebreds\*SS2=8.98±1.6b; Purebreds\* SS3=11.4±2.2ab; Crossbreds\*SS1=8.6±1.1b; Crossbreds\*SS2=12.4±0.9a; Crossbreds\*SS3=12.1±1.0a.

<sup>5</sup> Least square means estimates for the interactions genetic line\*semen storage duration (P=0.03): Purebreds\*SS1=6.59±0.4a; Purebreds\*SS2=5.26±0.3ab; Purebreds\* SS3=5.50±0.4ab; Crossbreds\*SS1=5.28±0.2ab; Crossbreds\*SS2=5.35±0.2ab; Crossbreds\*SS3=5.31±0.2b.
